# Supplementary material for: A Novel Platform for Evaluating the Environmental Impacts on Bacterial Cellulose Production
Source: PubMed Central journal article supplement (PMC5893554; doi:10.1038/s41598-018-23701-y), 2018-04-10
Supplement: 41598_2018_23701_MOESM1_ESM.pdf [file 41598_2018_23701_MOESM1_ESM.pdf]

# A Novel Platform for Evaluating the Environmental Impact on Bacterial Cellulose Production

Anindya Basu<sup>a,b</sup>, Sundaravadanam Vishnu Vadanana<sup>a</sup>, Sierin Lim<sup>a\*</sup>

<sup>a</sup> School of Chemical and Biomedical Engineering, Nanyang Technological University, Singapore

<sup>b</sup> School of Pharmaceutical Sciences, Rajiv Gandhi Technical University, Bhopal, India

\* Corresponding Author:

Sierin Lim

Nanyang Technological University

School of Chemical and Biomedical Engineering

70 Nanyang Drive

Singapore 637457

Office: Block N1.3-B3-11

## Supplementary Information

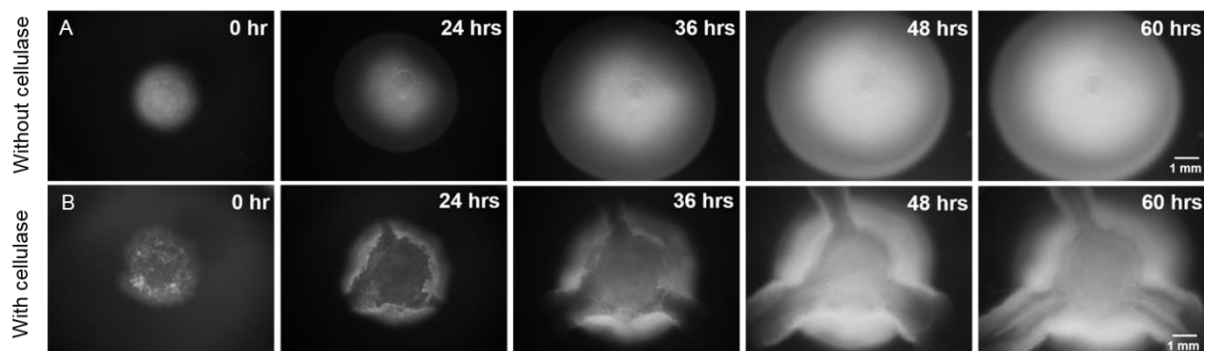

**Figure S1** Typical growth patterns of *G. xylinus* 700178 bacteria grown in the absence (A) and in the presence (B) of cellulase at different time points during incubation.
